# Supplementary material for: Support studies toward the hicksoane alkaloids reveal cascade reactions of a (tryptophanamido)methylglycinate
Source: Royal Society of Chemistry journal article supplement (doi:10.1039/d3ob01596c), 2023-01-01
Supplement: d3ob01596c1.pdf [file d3ob01596c1.pdf]

**Support studies toward the hicksoane alkaloids reveals cascade  
reactions of a (tryptophanamido)methylglycinate**

Stephanie Lee, Tilo Söhnel and Jonathan Sperry\*

[j.sperry@auckland.ac.nz](mailto:j.sperry@auckland.ac.nz)

**SUPPORTING INFORMATION**

## CONTENTS

|                                                                         |     |
|-------------------------------------------------------------------------|-----|
| $^1\text{H}$ NMR spectrum of <b>5</b>                                   | S1  |
| $^{13}\text{C}$ NMR spectrum of <b>5</b>                                | S2  |
| $^1\text{H}$ NMR spectrum of <b>2•2HCl</b>                              | S3  |
| $^{13}\text{C}$ NMR spectrum of <b>2•2HCl</b>                           | S4  |
| $^1\text{H}$ NMR spectrum of <b>7</b> (DMSO- <i>d</i> <sub>6</sub> )    | S5  |
| $^{13}\text{C}$ NMR spectrum of <b>7</b> (DMSO- <i>d</i> <sub>6</sub> ) | S6  |
| $^1\text{H}$ NMR spectrum of <b>7</b> (CD <sub>3</sub> OD)              | S7  |
| $^{13}\text{C}$ NMR spectrum of <b>7</b> (CD <sub>3</sub> OD)           | S8  |
| $^1\text{H}$ NMR spectrum of <b>10</b>                                  | S9  |
| $^{13}\text{C}$ NMR spectrum of <b>10</b>                               | S10 |
| $^1\text{H}$ NMR spectrum of <b>9</b>                                   | S11 |
| $^{13}\text{C}$ NMR spectrum of <b>9</b>                                | S12 |
| $^1\text{H}$ NMR spectrum of <b>8•HCl</b>                               | S13 |
| $^{13}\text{C}$ NMR spectrum of <b>8•HCl</b>                            | S14 |
| Crystallographic data for <b>7</b>                                      | S15 |
| Crystallographic data for <b>9</b>                                      | S17 |
| Crystallographic data for <b>8•HCl</b>                                  | S19 |

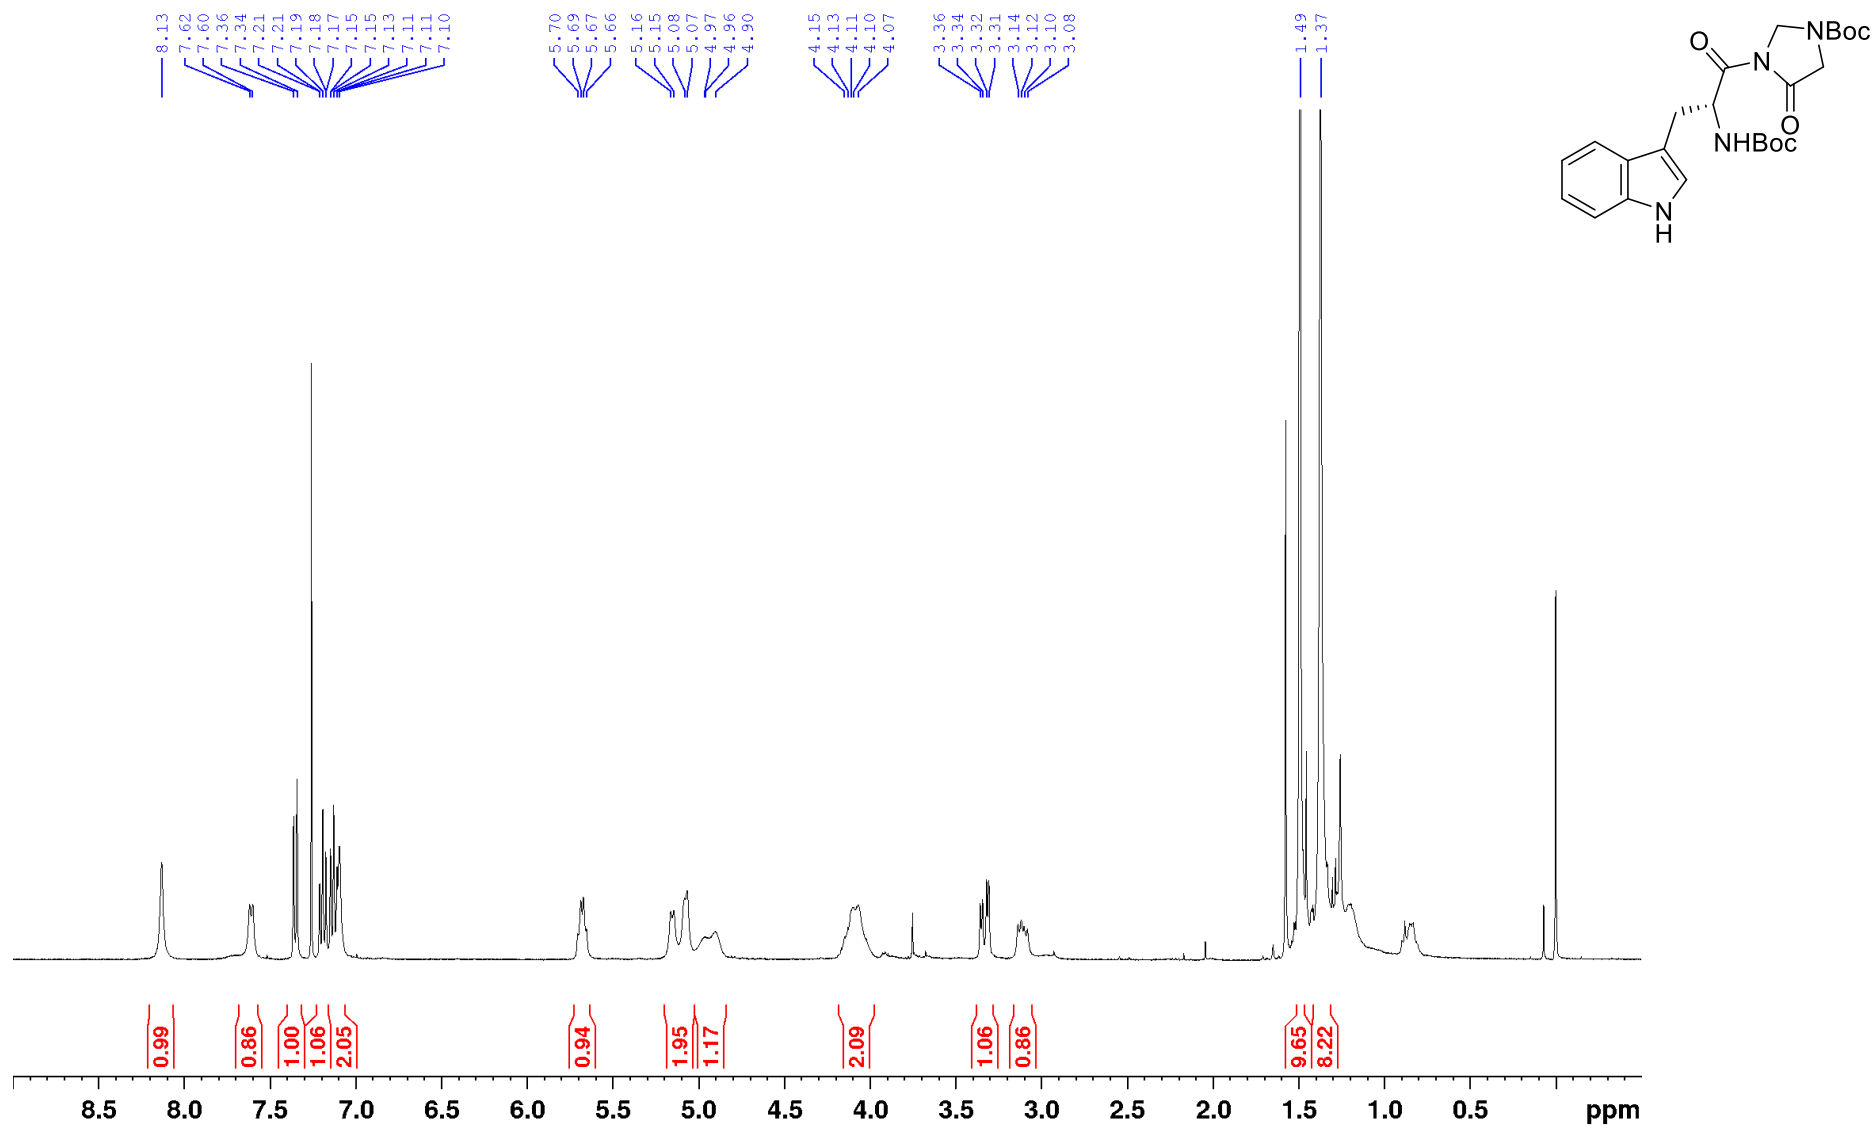

$^1\text{H}$  NMR spectrum of **5** (400 MHz,  $\text{CDCl}_3$ ).

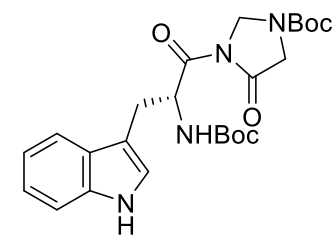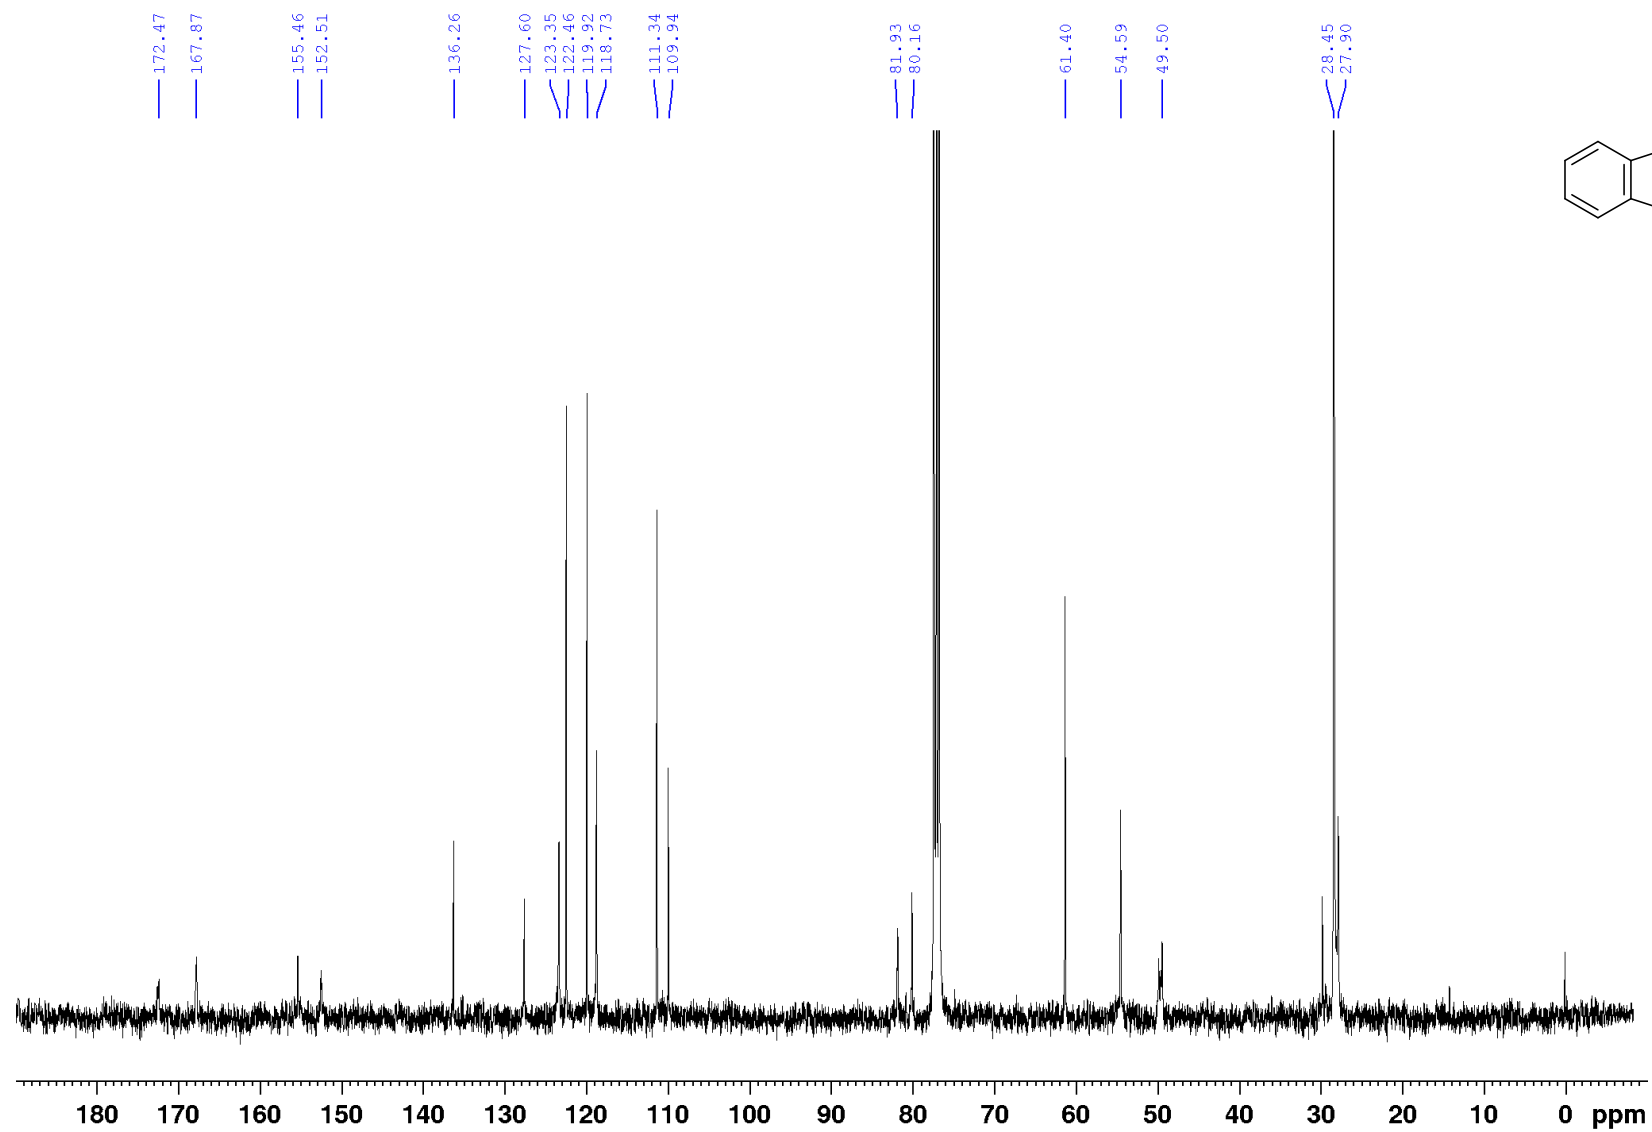

$^{13}\text{C}$  NMR spectrum of **5** (100 MHz,  $\text{CDCl}_3$ ).

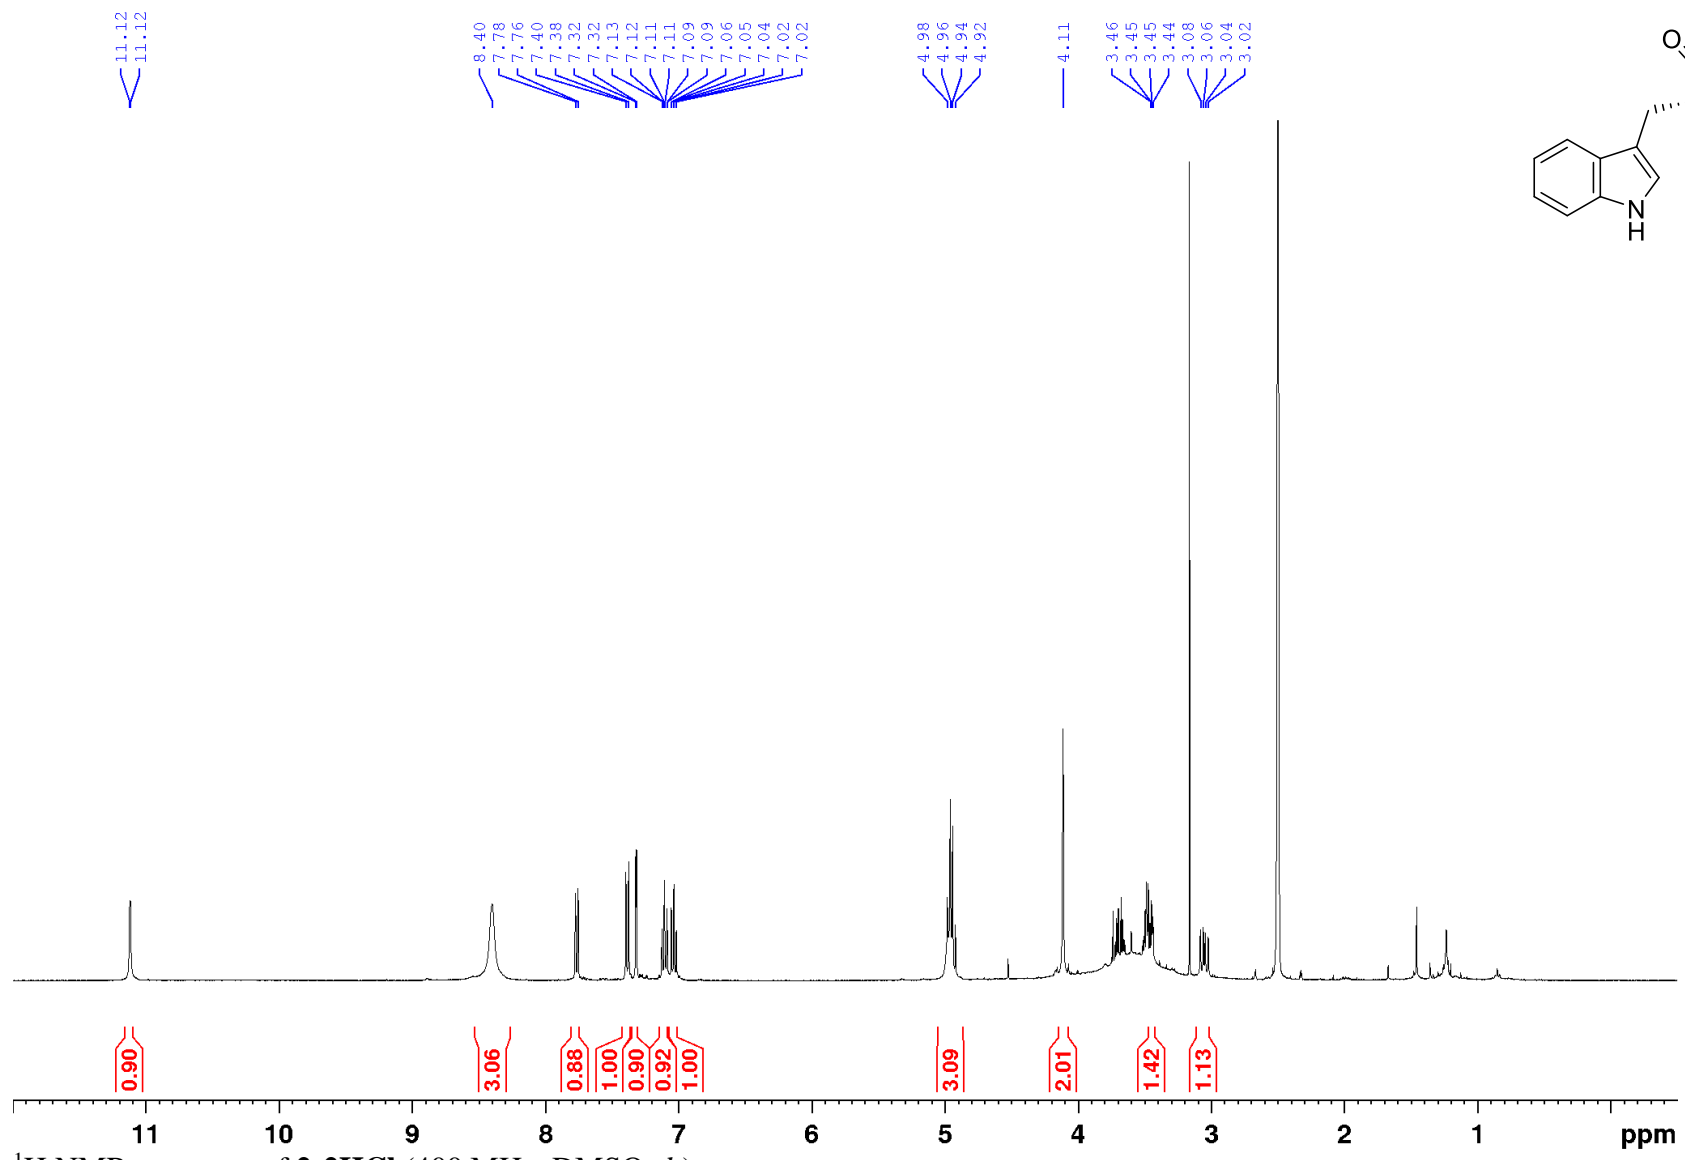

$^1\text{H}$  NMR spectrum of **2•2HCl** (400 MHz,  $\text{DMSO-}d_6$ ).

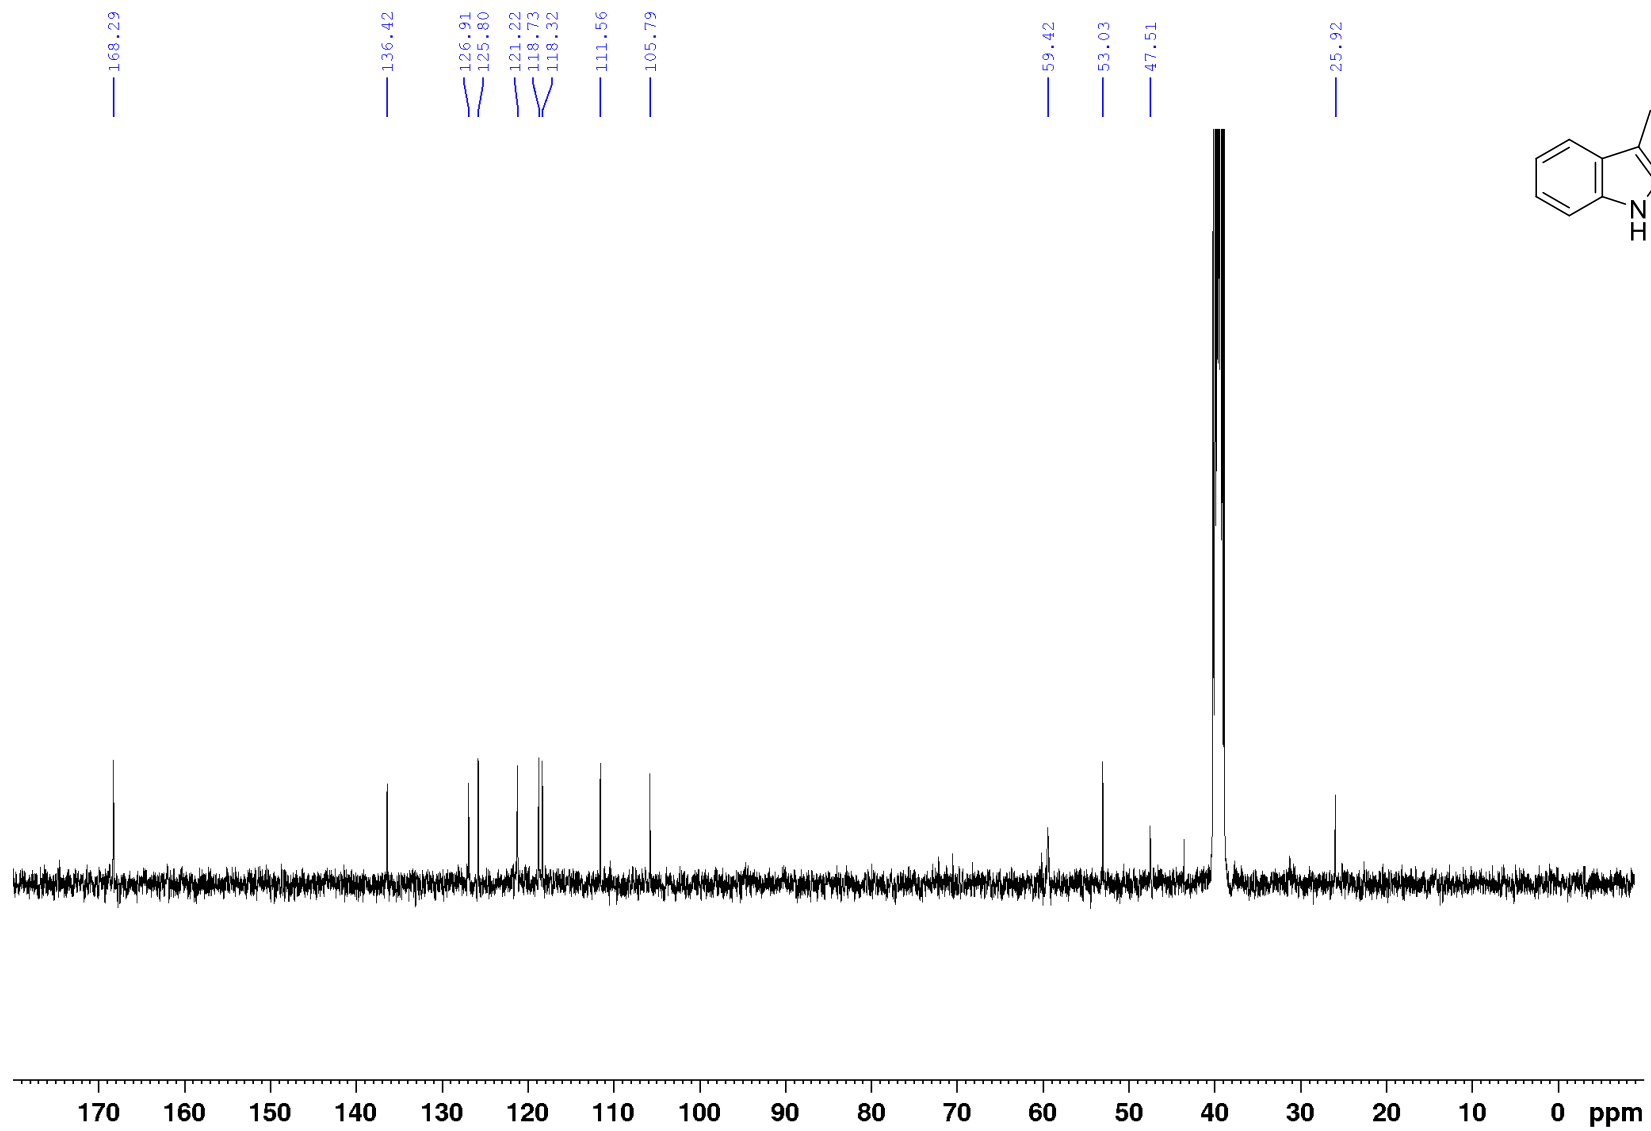

$^{13}\text{C}$  NMR spectrum of **2**•**2HCl** (100 MHz,  $\text{DMSO-}d_6$ ).

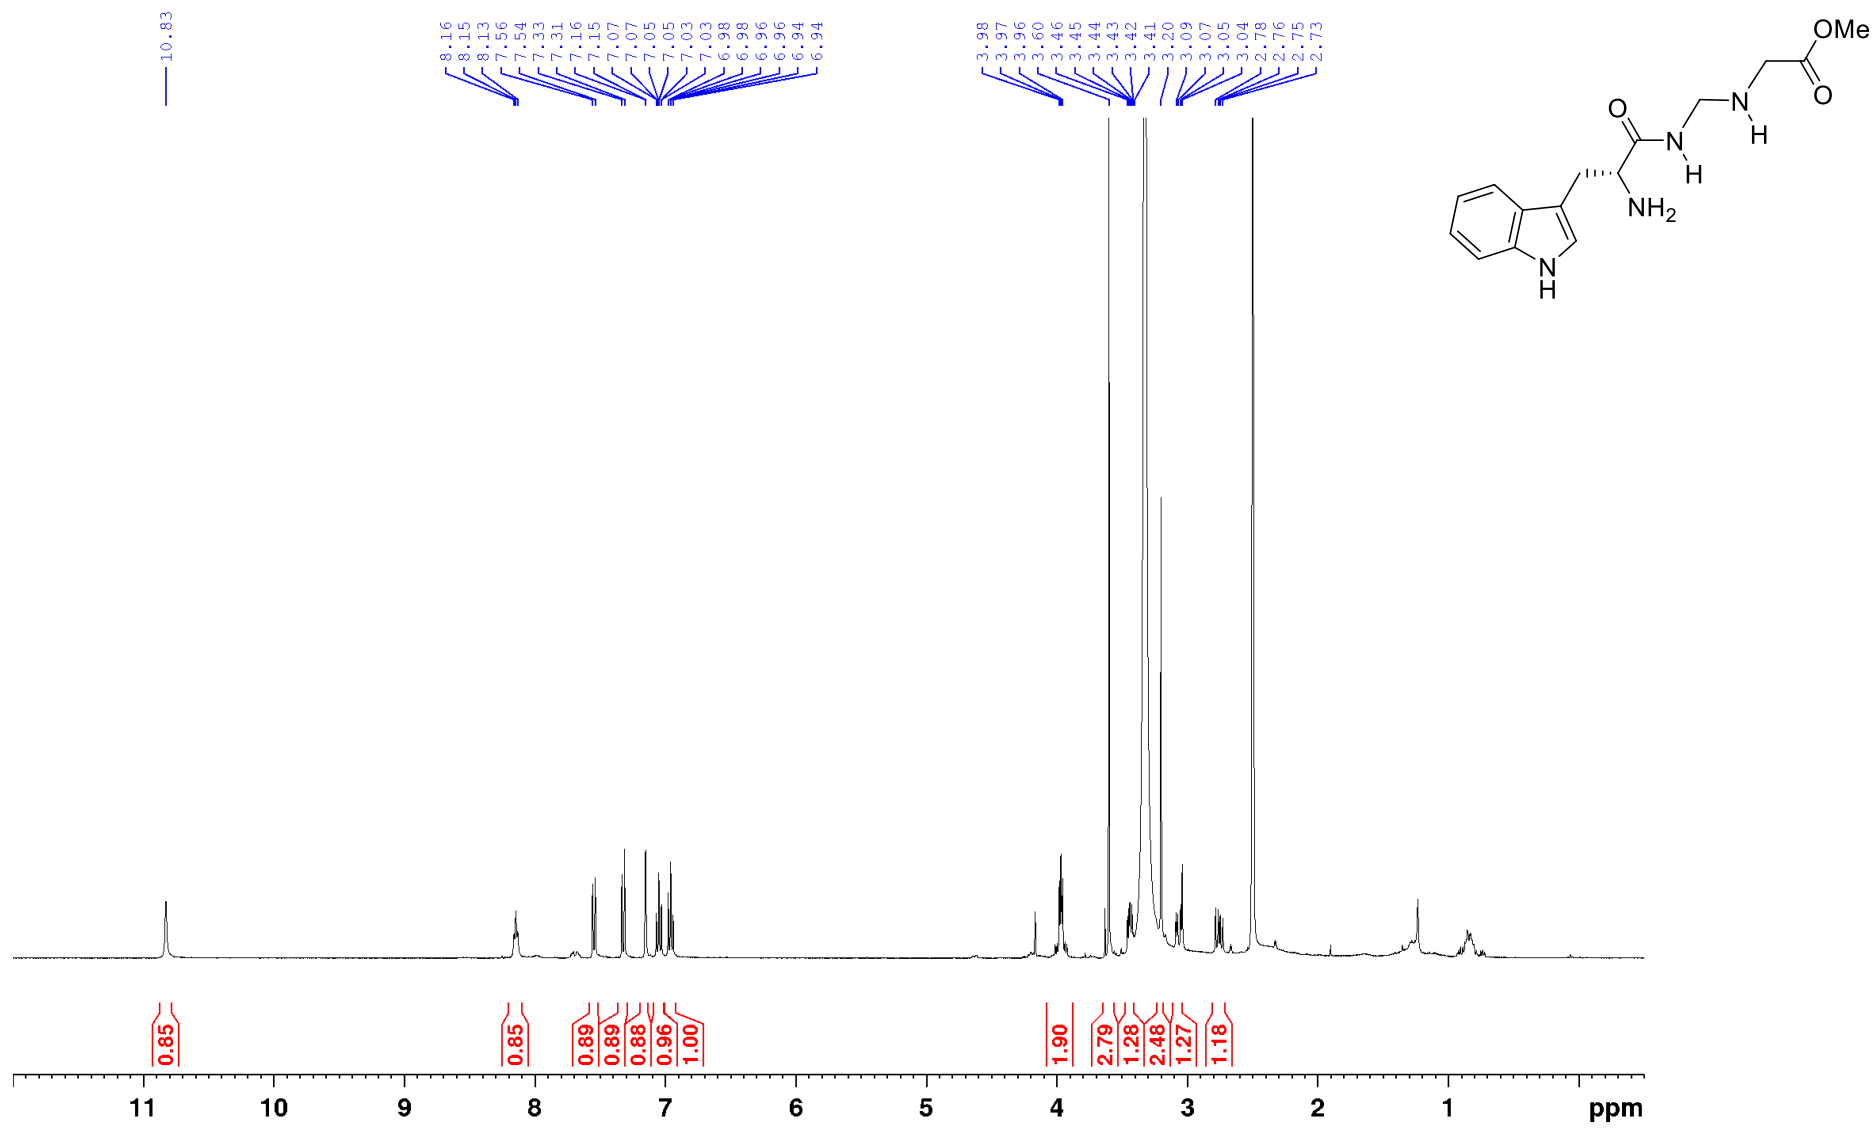

<sup>1</sup>H NMR spectrum of 7 (400 MHz, DMSO-*d*<sub>6</sub>).

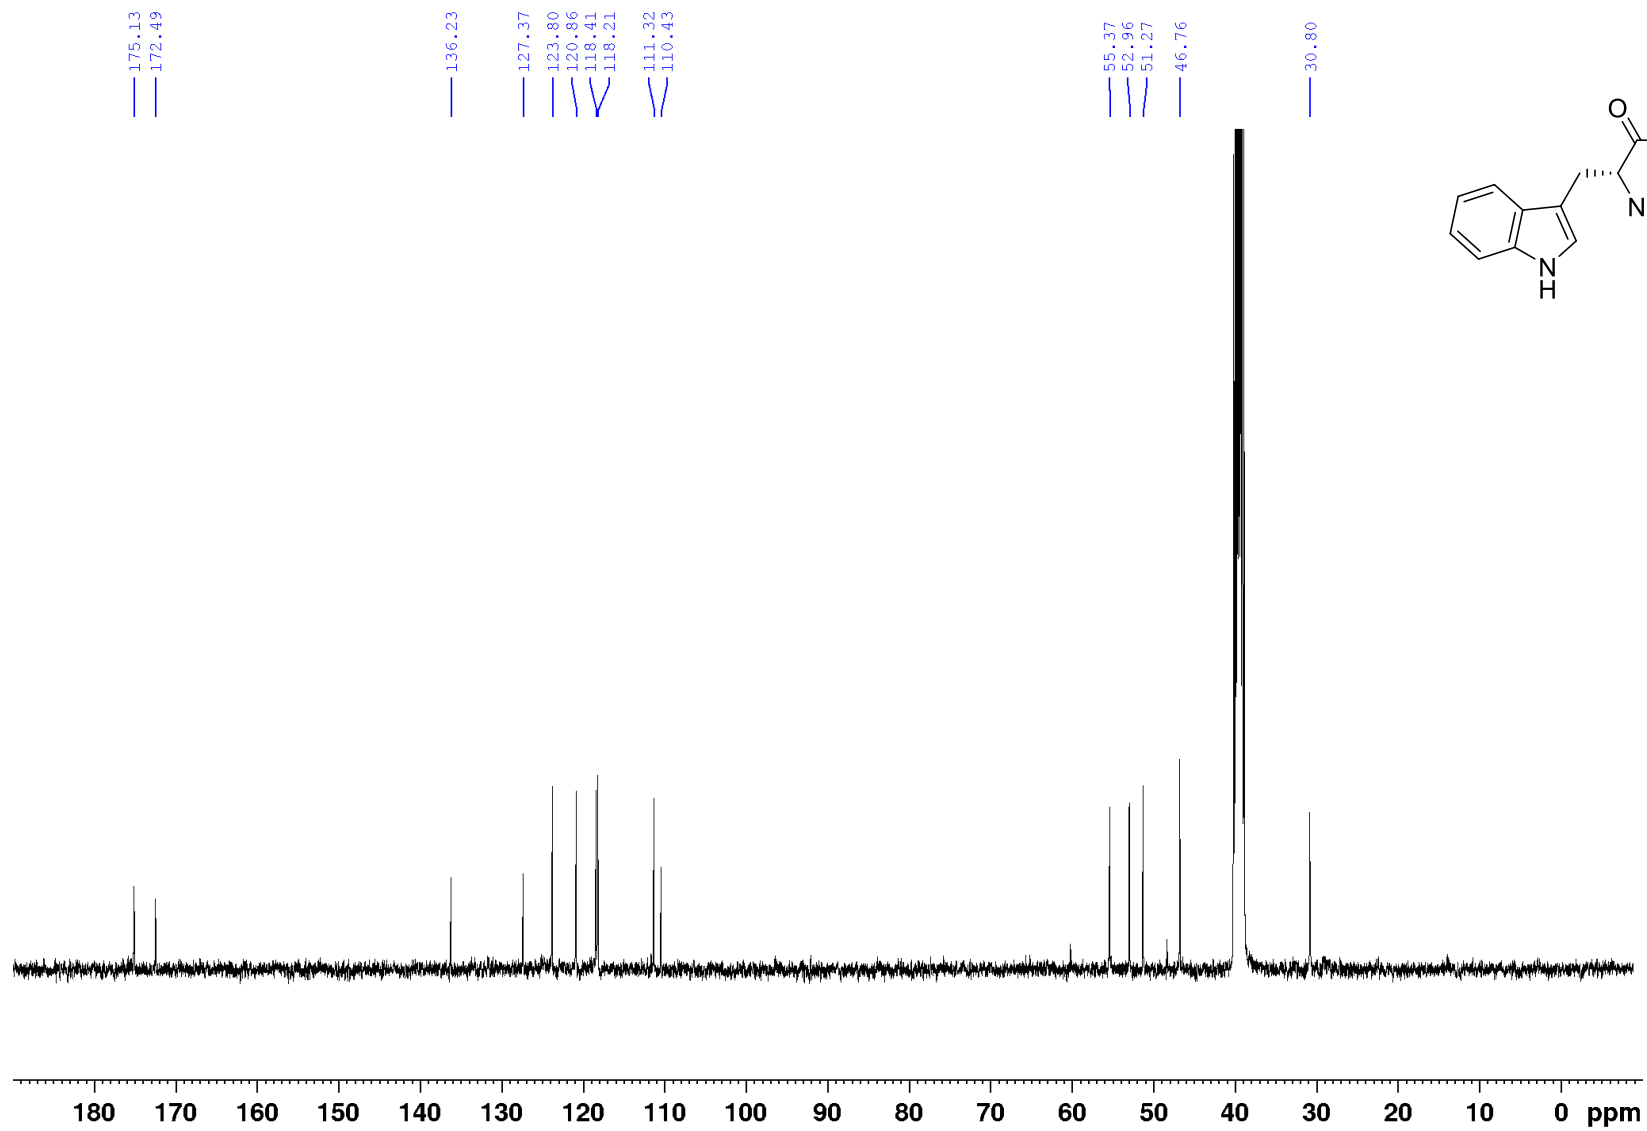

$^{13}\text{C}$  NMR spectrum of **7** (100 MHz,  $\text{DMSO-}d_6$ ).



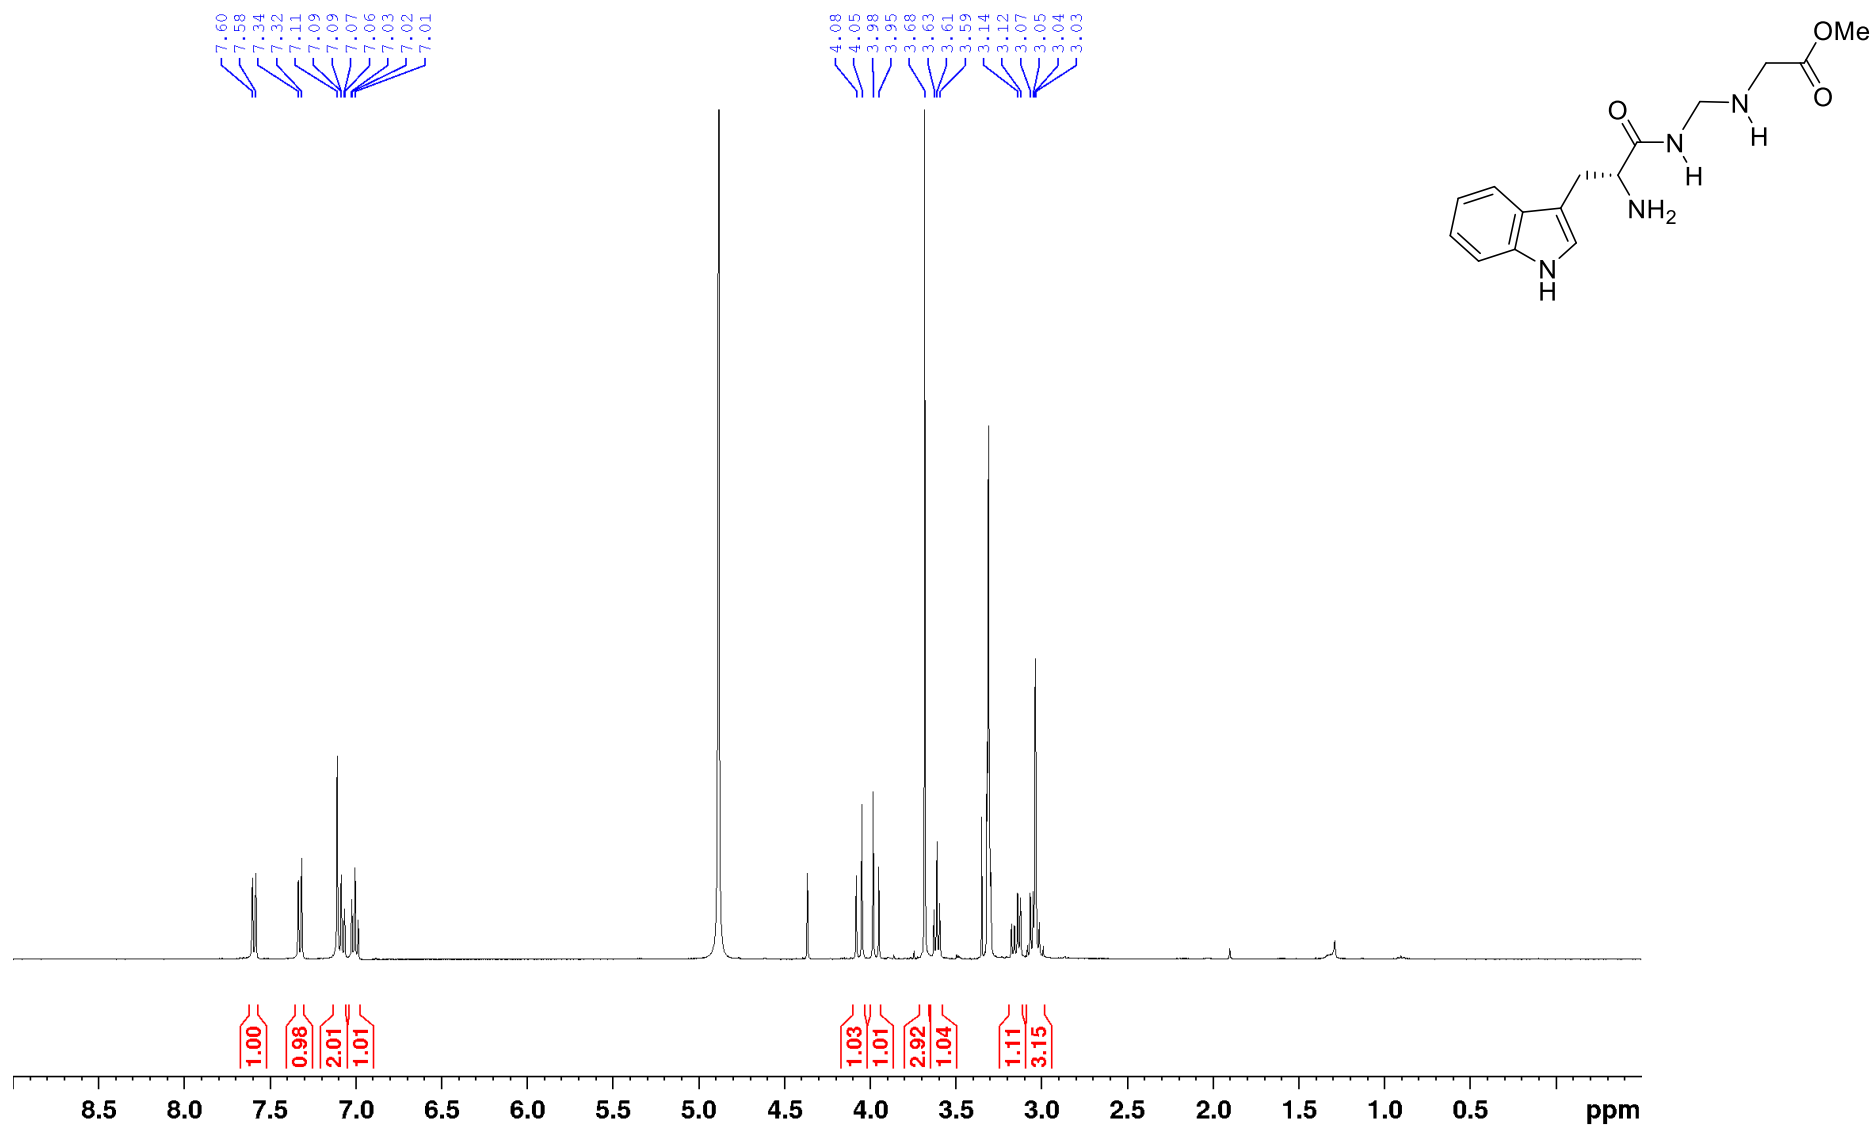

<sup>1</sup>H NMR spectrum of **7** (400 MHz, CD<sub>3</sub>OD).

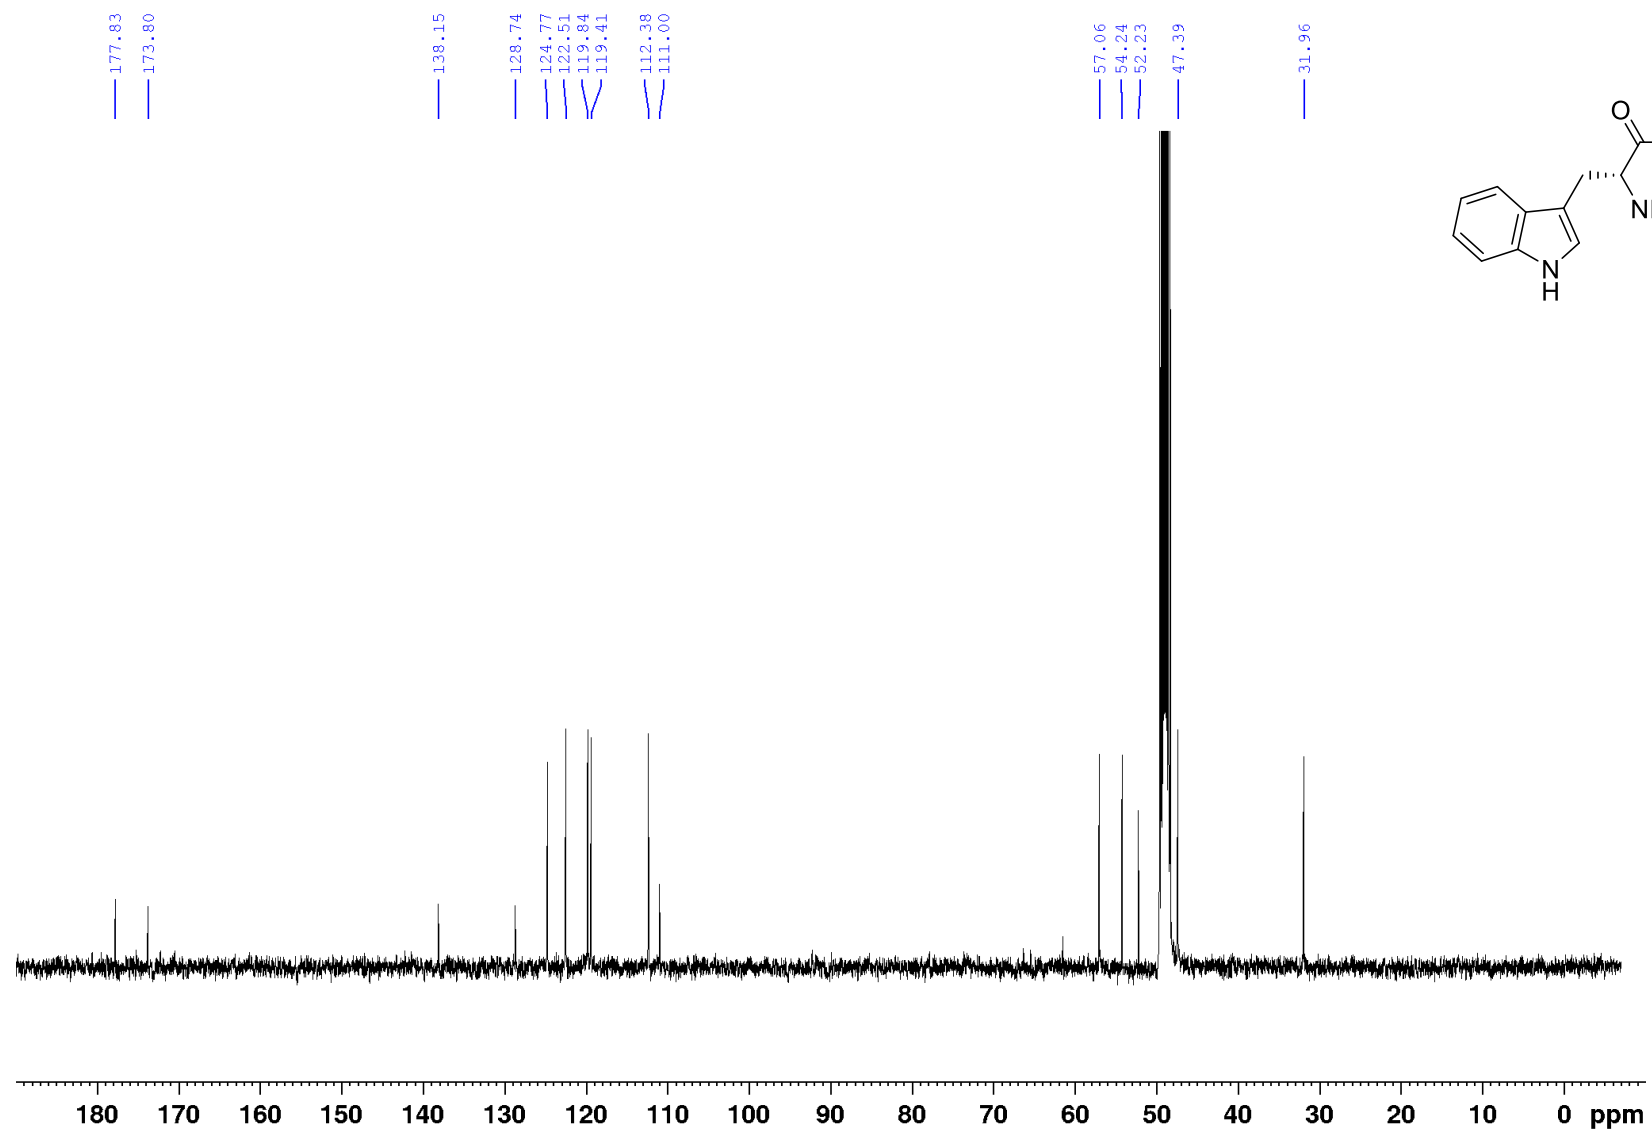

$^{13}\text{C}$  NMR spectrum of **7** (100 MHz,  $\text{CD}_3\text{OD}$ ).

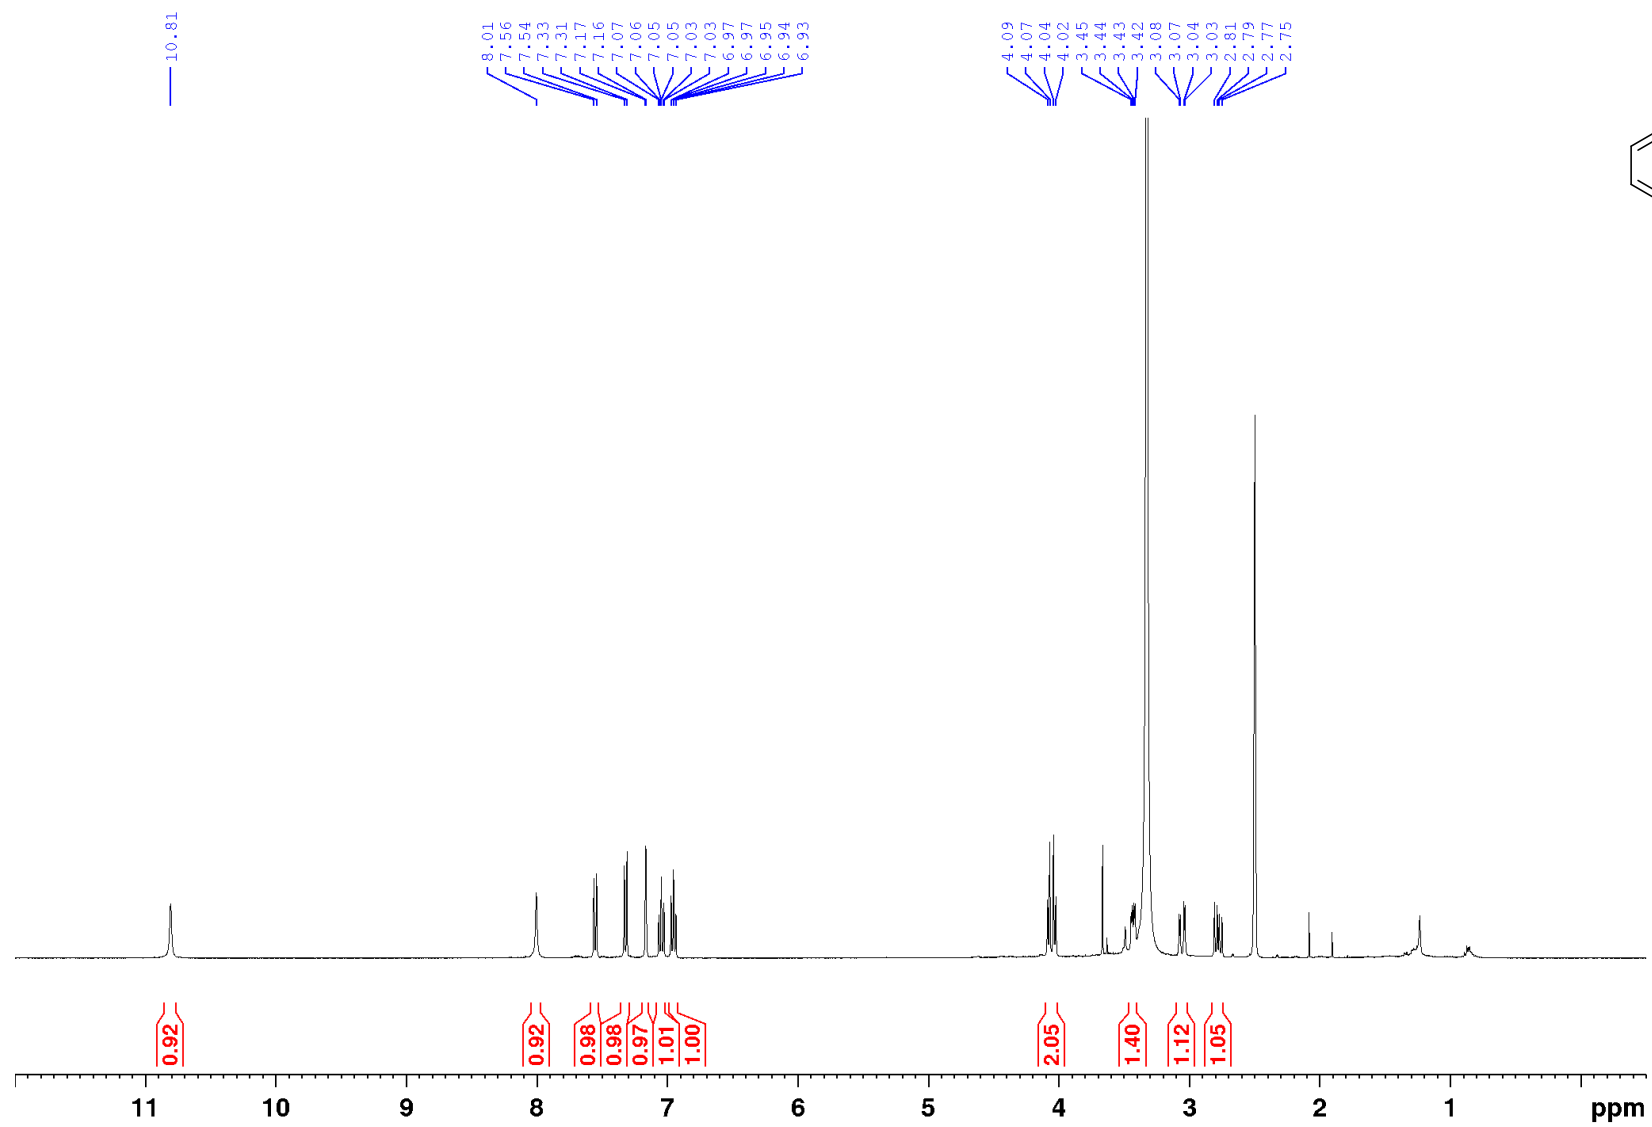

$^1\text{H}$  NMR spectrum of **10** (400 MHz,  $\text{DMSO-}d_6$ ).

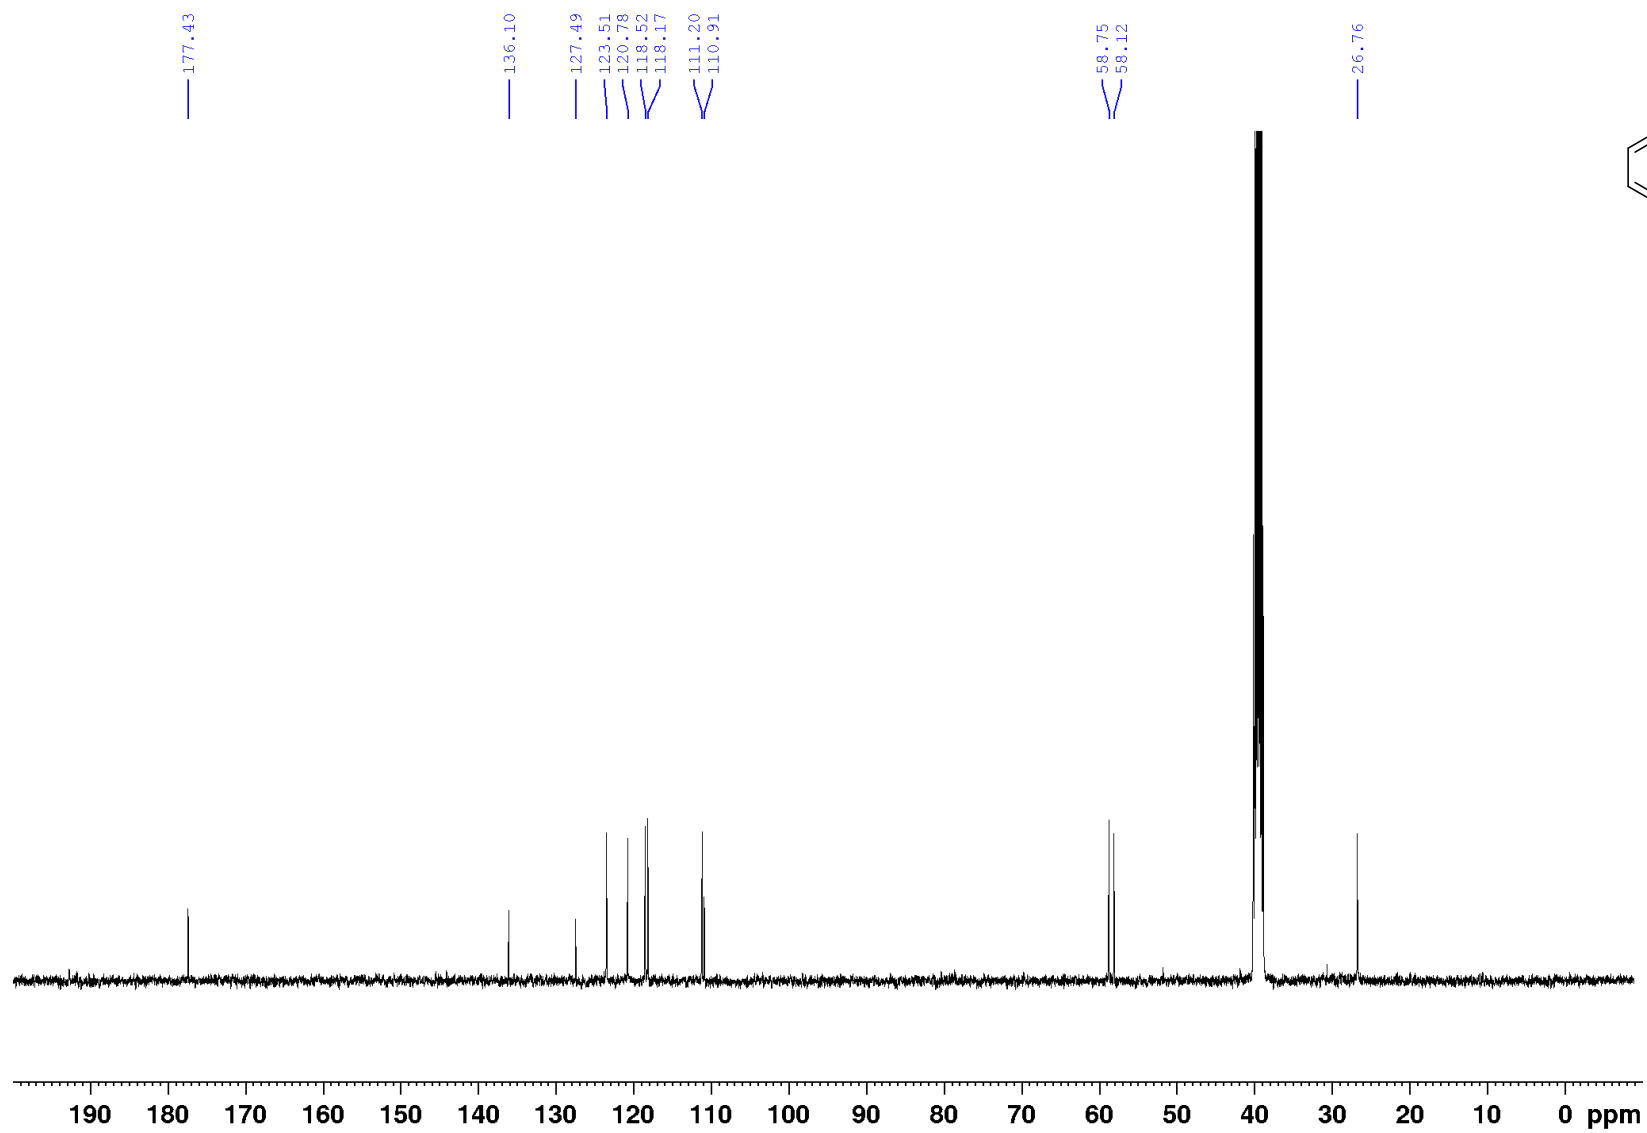

$^{13}\text{C}$  NMR spectrum of **10** (100 MHz,  $\text{DMSO-}d_6$ ).

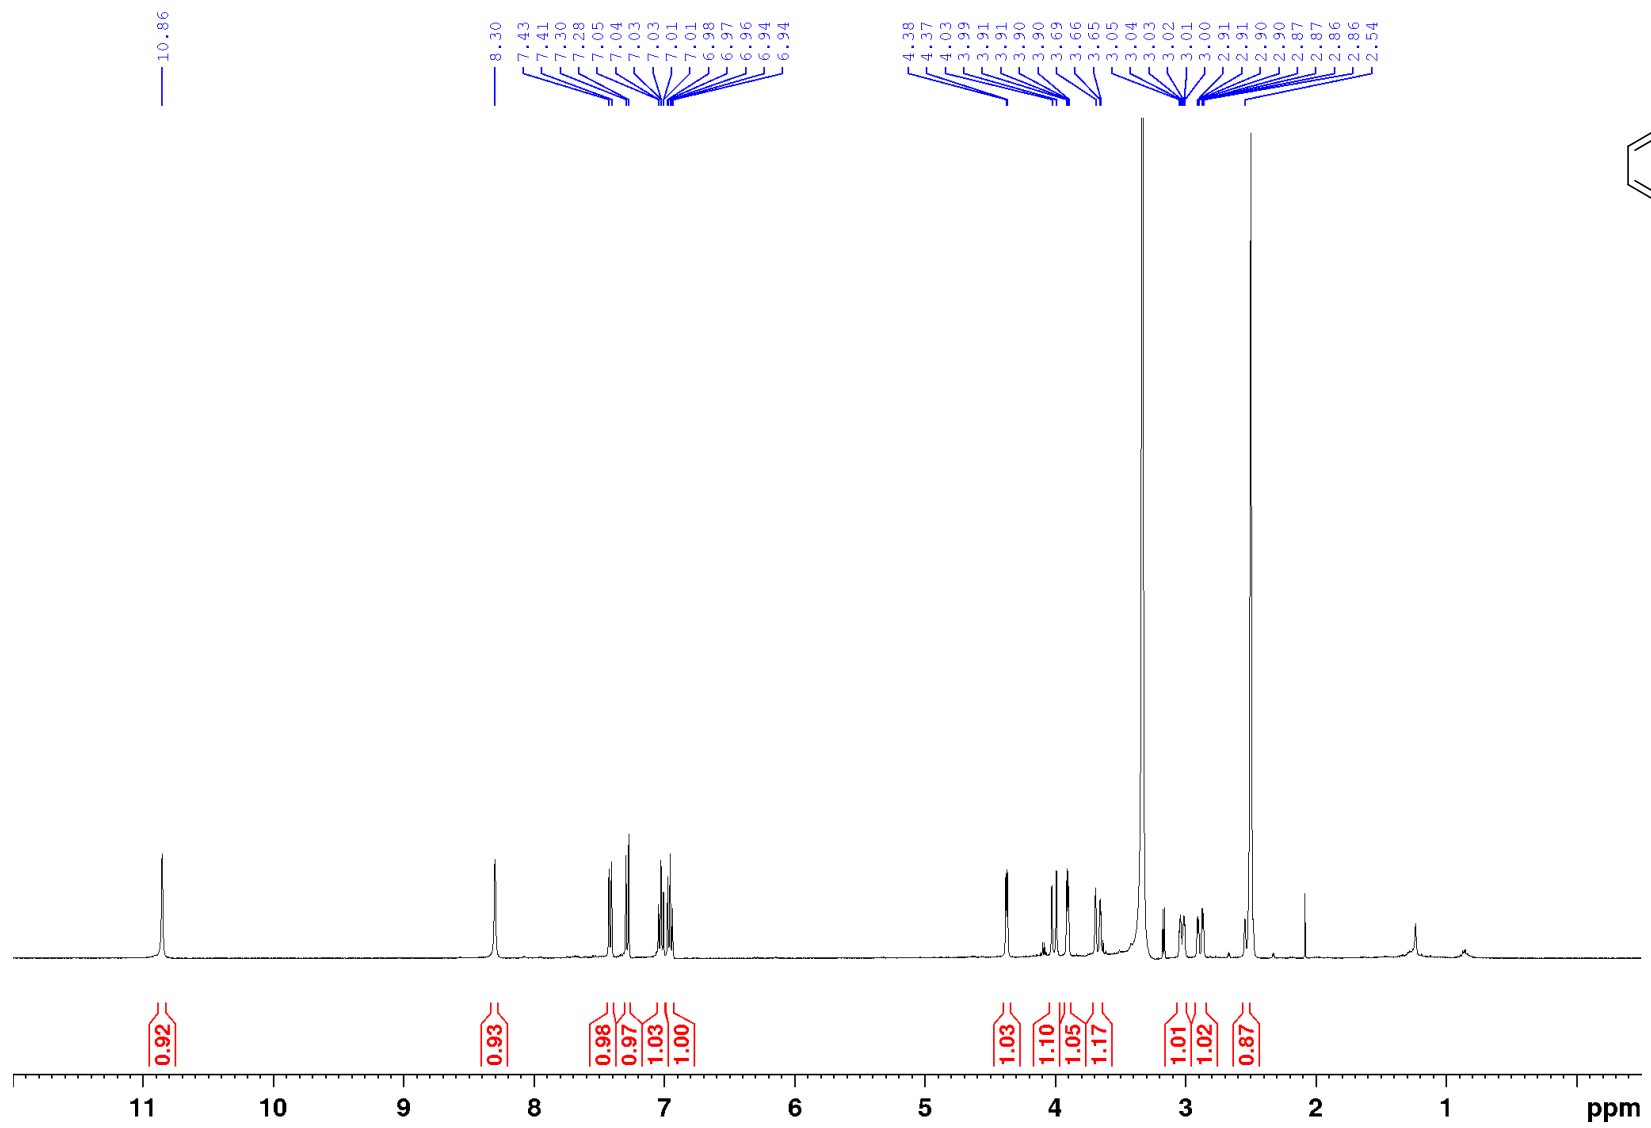

<sup>1</sup>H NMR spectrum of **9** (400 MHz, DMSO-*d*<sub>6</sub>).

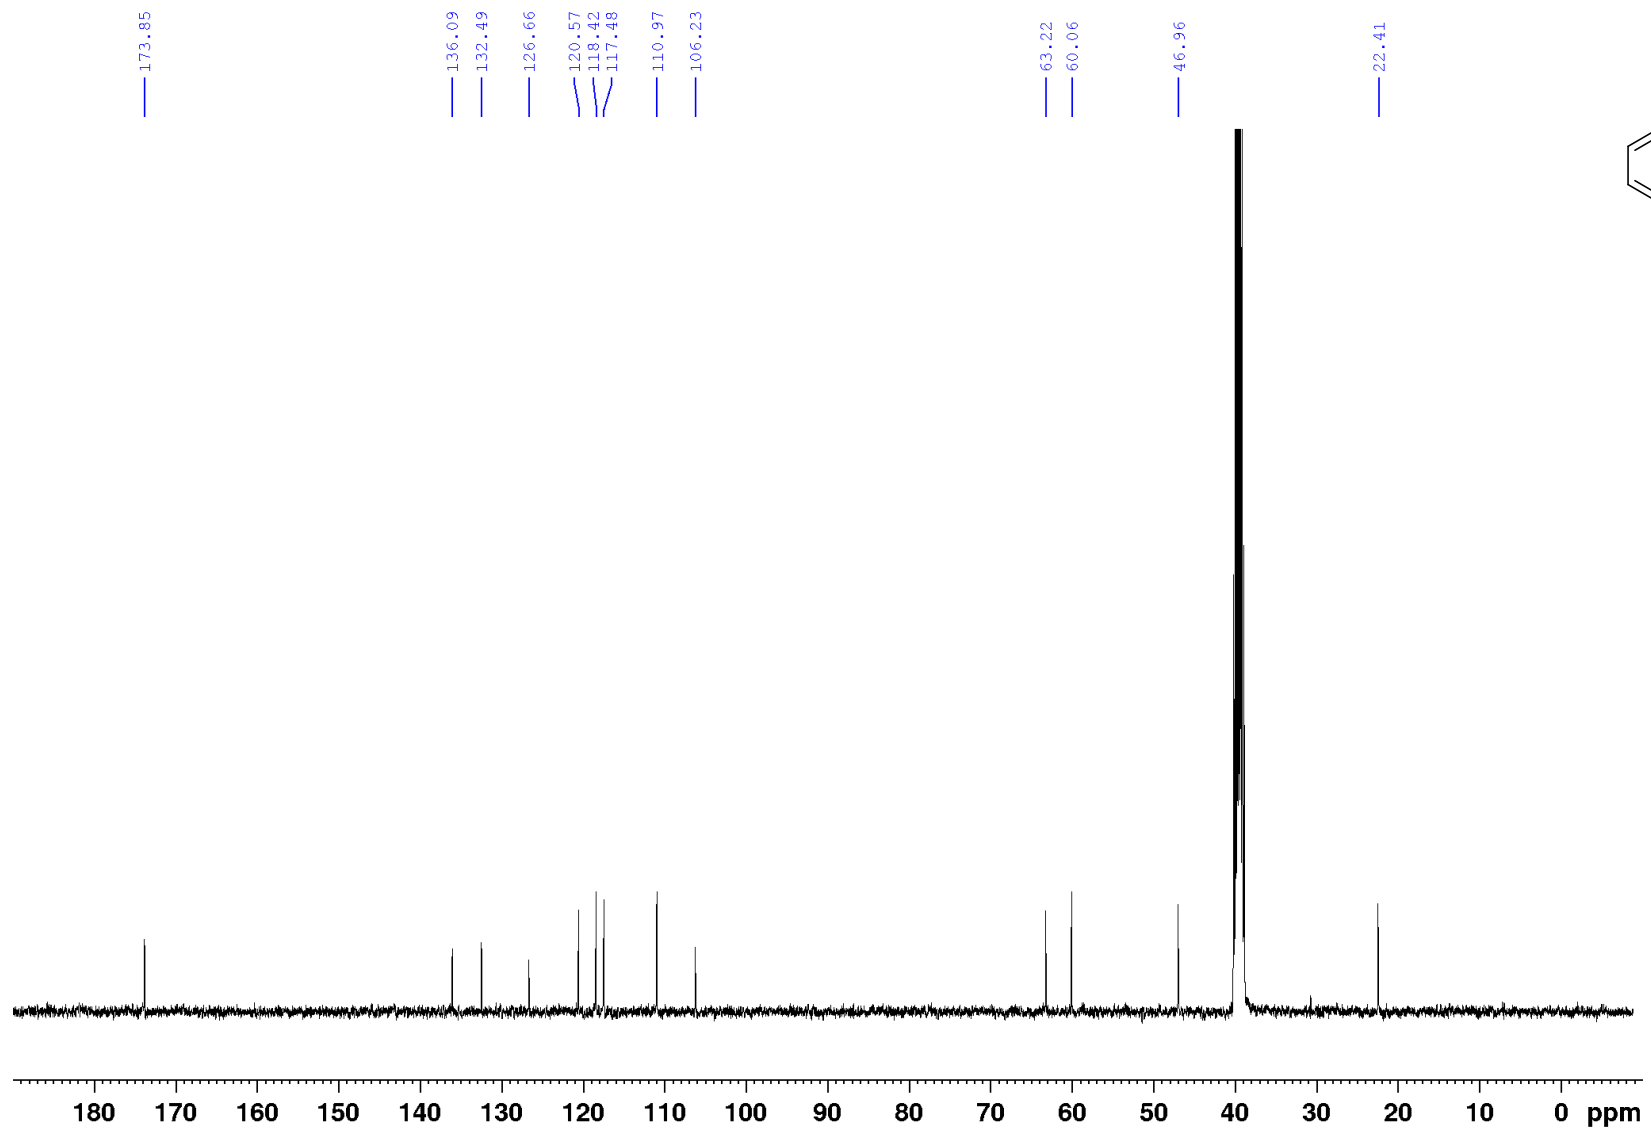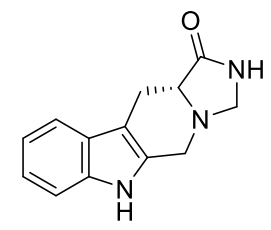

<sup>13</sup>C NMR spectrum of **9** (100 MHz, DMSO-*d*<sub>6</sub>).

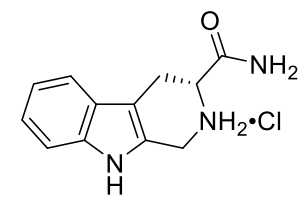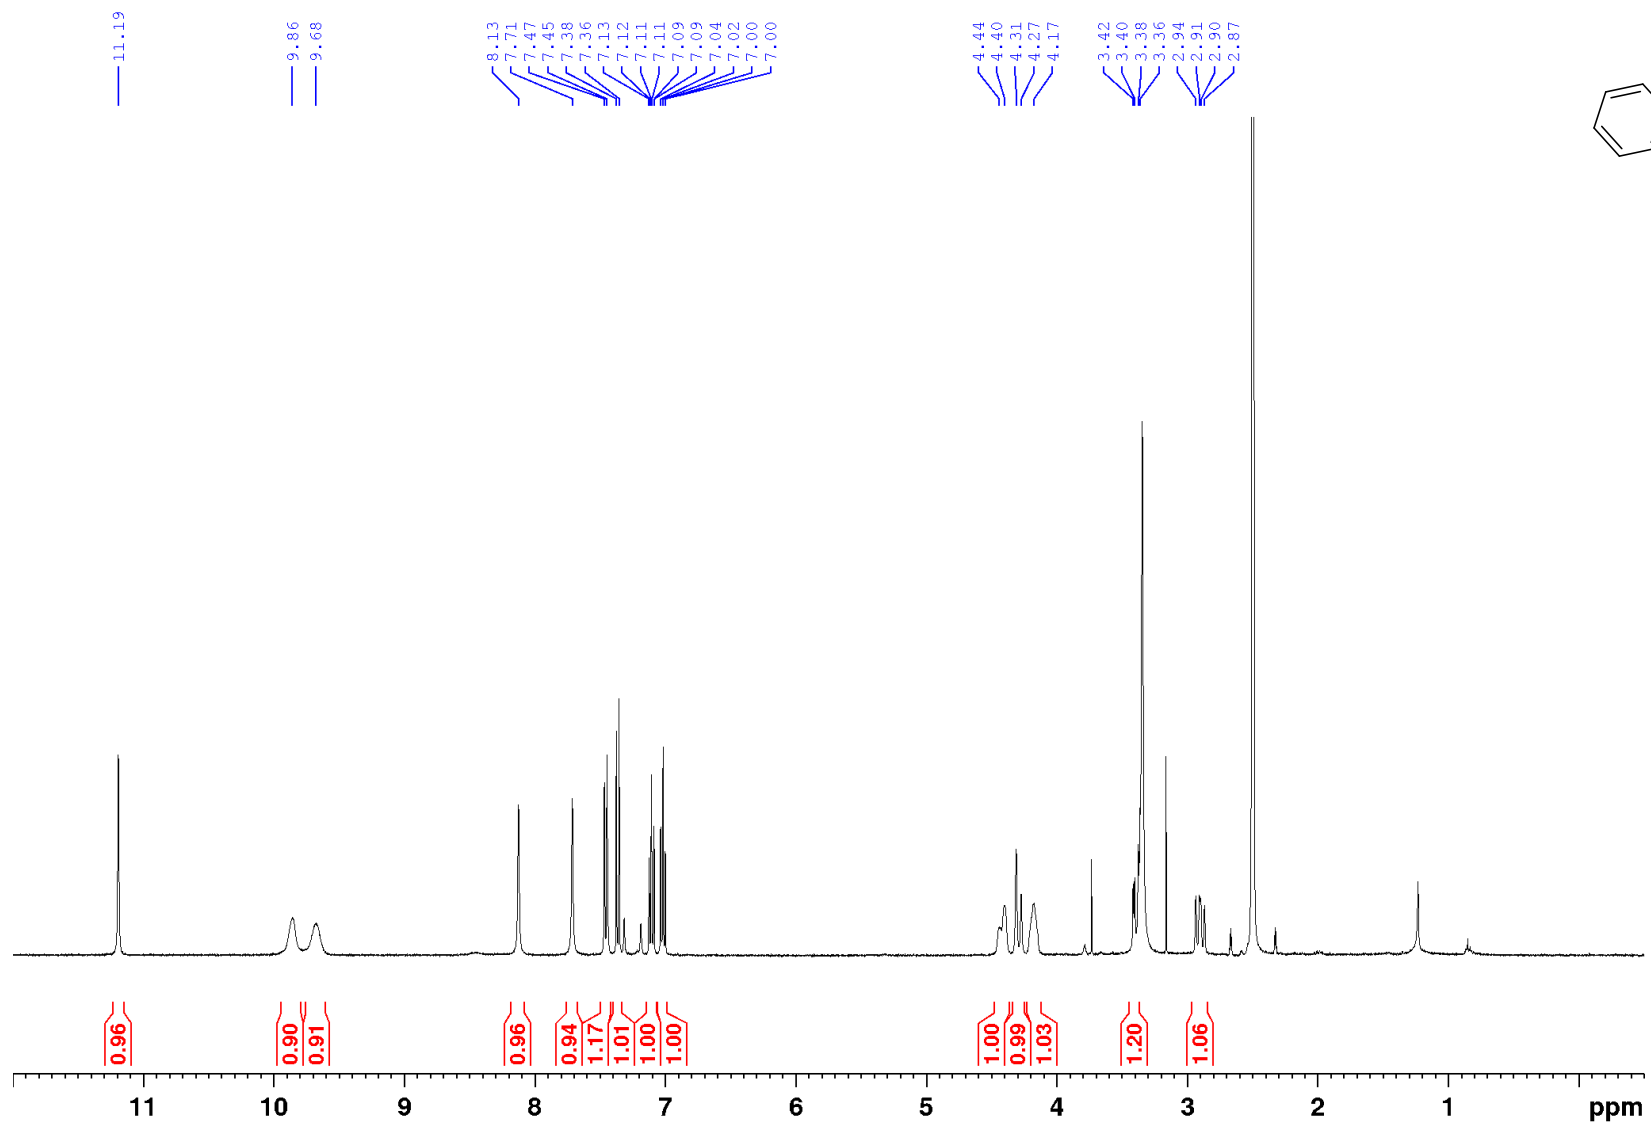

<sup>1</sup>H NMR spectrum of **8**·HCl (400 MHz, DMSO-*d*<sub>6</sub>).

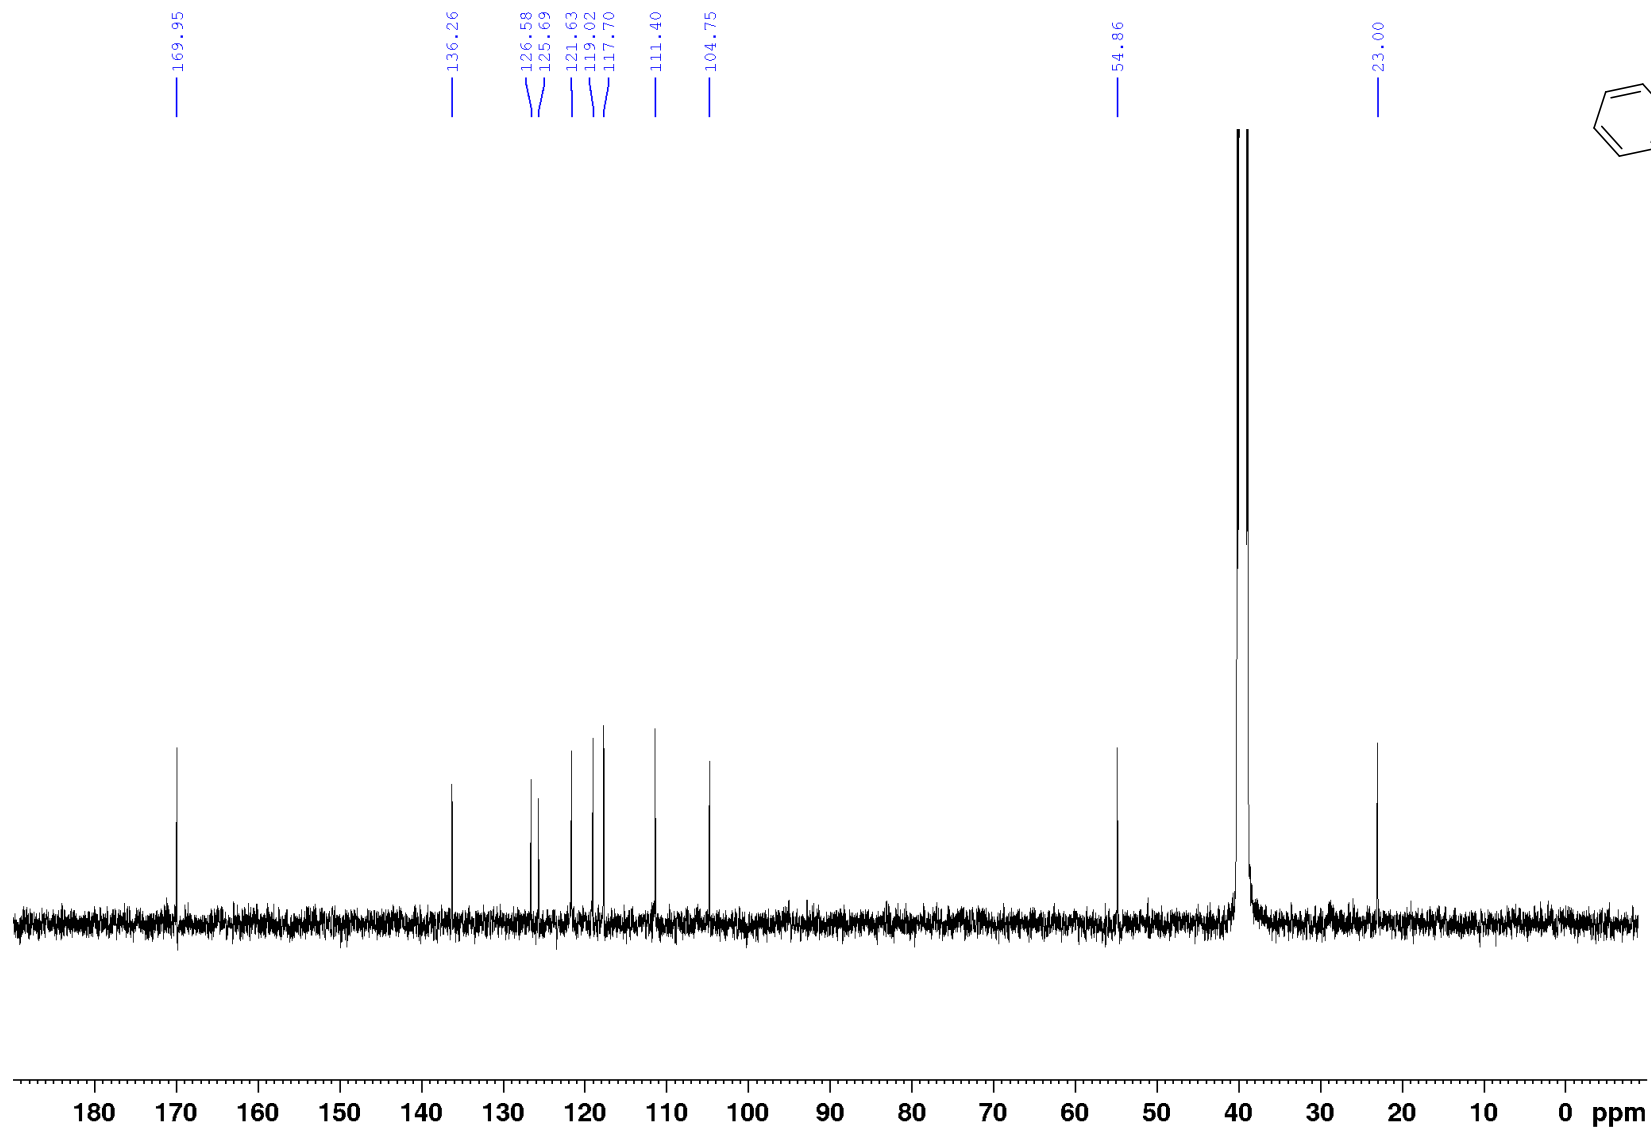

<sup>13</sup>C NMR spectrum of **8•HCl** (100 MHz, DMSO-*d*<sub>6</sub>).



## Crystallographic Data for 7

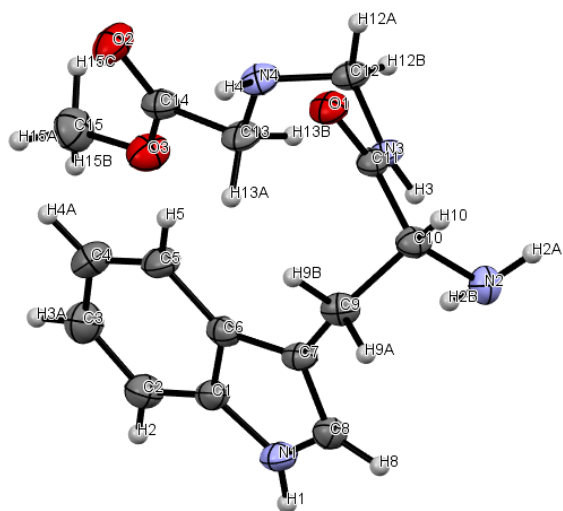

ORTEP representation of 7.

**Table S1.** Crystal data and structure refinement for **7**.

|                                             |                                                               |
|---------------------------------------------|---------------------------------------------------------------|
| CCDC number                                 | 2281801                                                       |
| Identification code                         | SYL-06-20_01                                                  |
| Empirical formula                           | C <sub>15</sub> H <sub>20</sub> N <sub>4</sub> O <sub>3</sub> |
| Formula weight                              | 304.35                                                        |
| Temperature/K                               | 120(1)                                                        |
| Crystal system                              | monoclinic                                                    |
| Space group                                 | C2                                                            |
| a/Å                                         | 16.2851(13)                                                   |
| b/Å                                         | 5.2346(4)                                                     |
| c/Å                                         | 18.9492(16)                                                   |
| α/°                                         | 90                                                            |
| β/°                                         | 112.304(10)                                                   |
| γ/°                                         | 90                                                            |
| Volume/Å <sup>3</sup>                       | 1494.5(2)                                                     |
| Z                                           | 4                                                             |
| ρ <sub>calc</sub> /mm <sup>3</sup>          | 1.353                                                         |
| μ/mm <sup>-1</sup>                          | 0.794                                                         |
| F(000)                                      | 648.0                                                         |
| Crystal size/mm <sup>3</sup>                | 0.2 × 0.05 × 0.04                                             |
| 2θ range for data collection                | 11.748 to 135.458°                                            |
| Index ranges                                | -19 ≤ h ≤ 12, -6 ≤ k ≤ 5, -18 ≤ l ≤ 22                        |
| Reflections collected                       | 4802                                                          |
| Independent reflections                     | 2156[R(int) = 0.0507]                                         |
| Data/restraints/parameters                  | 2156/4/206                                                    |
| Goodness-of-fit on F <sup>2</sup>           | 1.043                                                         |
| Final R indexes [I ≥ 2σ (I)]                | R <sub>1</sub> = 0.0514, wR <sub>2</sub> = 0.1298             |
| Final R indexes [all data]                  | R <sub>1</sub> = 0.0636, wR <sub>2</sub> = 0.1390             |
| Largest diff. peak/hole / e Å <sup>-3</sup> | 0.37/-0.26                                                    |
| Flack parameter                             | 0.0(3)                                                        |
| Crystallisation solvent system              | Methanol/Dichloromethane (Slow evaporation)                   |

## Crystallographic Data for **9**

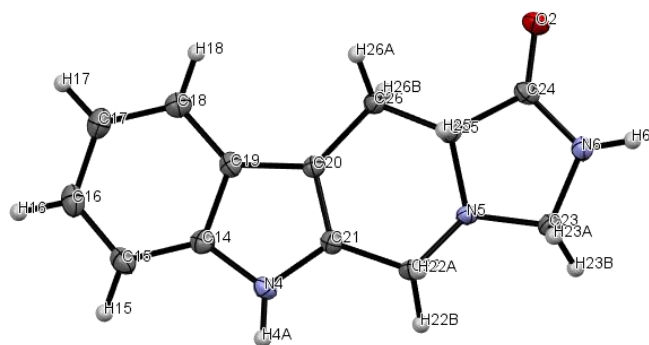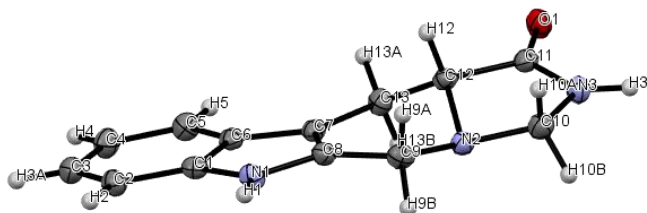

ORTEP representation with labels of two molecules of **9**.

**Table S2.** Crystal data and structure refinement for **9**.

|                                             |                                                               |
|---------------------------------------------|---------------------------------------------------------------|
| CCDC number                                 | 2281800                                                       |
| Identification code                         | SYL-06-08                                                     |
| Empirical formula                           | C <sub>26</sub> H <sub>26</sub> N <sub>6</sub> O <sub>2</sub> |
| Formula weight                              | 454.53                                                        |
| Temperature/K                               | 113(1)                                                        |
| Crystal system                              | orthorhombic                                                  |
| Space group                                 | P2 <sub>1</sub> 2 <sub>1</sub> 2 <sub>1</sub>                 |
| a/Å                                         | 6.45921(12)                                                   |
| b/Å                                         | 15.7500(3)                                                    |
| c/Å                                         | 21.1734(4)                                                    |
| α/°                                         | 90                                                            |
| β/°                                         | 90                                                            |
| γ/°                                         | 90                                                            |
| Volume/Å <sup>3</sup>                       | 2154.03(7)                                                    |
| Z                                           | 4                                                             |
| ρ <sub>calc</sub> /mm <sup>3</sup>          | 1.402                                                         |
| μ/mm <sup>-1</sup>                          | 0.743                                                         |
| F(000)                                      | 960.0                                                         |
| Crystal size/mm <sup>3</sup>                | 0.35 × 0.03 × 0.03                                            |
| 2θ range for data collection                | 6.994 to 145.042°                                             |
| Index ranges                                | -7 ≤ h ≤ 7, -13 ≤ k ≤ 18, -25 ≤ l ≤ 25                        |
| Reflections collected                       | 9625                                                          |
| Independent reflections                     | 3813[R(int) = 0.0388]                                         |
| Data/restraints/parameters                  | 3813/0/307                                                    |
| Goodness-of-fit on F <sup>2</sup>           | 1.078                                                         |
| Final R indexes [I ≥ 2σ (I)]                | R <sub>1</sub> = 0.0365, wR <sub>2</sub> = 0.0914             |
| Final R indexes [all data]                  | R <sub>1</sub> = 0.0395, wR <sub>2</sub> = 0.0926             |
| Largest diff. peak/hole / e Å <sup>-3</sup> | 0.17/-0.26                                                    |
| Flack parameter                             | 0.18(17)                                                      |
| Crystallisation solvent system              | Methanol (Slow evaporation)                                   |

## Crystallographic Data for **8**•HCl

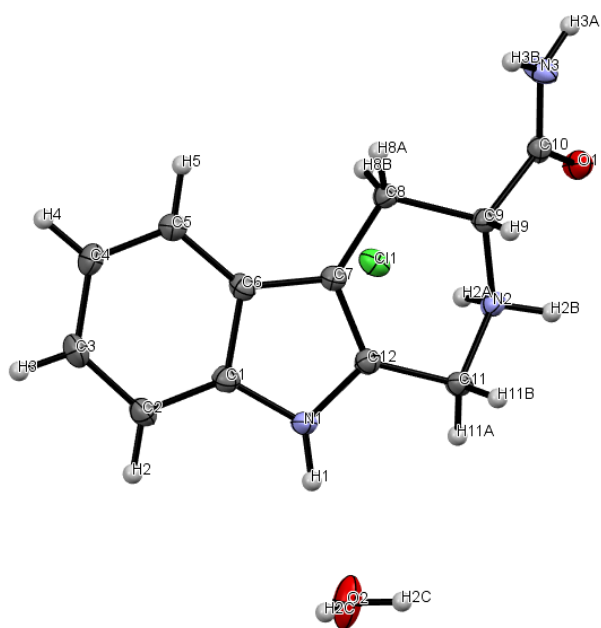

ORTEP representation of **8**•HCl (co-crystallised with one molecule of water).

**Table S3.** Crystal data and structure refinement for **8•HCl**.

|                                             |                                                                   |
|---------------------------------------------|-------------------------------------------------------------------|
| CCDC number                                 | 2281802                                                           |
| Identification code                         | SYL-06-23_2                                                       |
| Empirical formula                           | C <sub>12</sub> H <sub>15</sub> ClN <sub>3</sub> O <sub>1.5</sub> |
| Formula weight                              | 260.72                                                            |
| Temperature/K                               | 120(1)                                                            |
| Crystal system                              | monoclinic                                                        |
| Space group                                 | C2                                                                |
| a/Å                                         | 12.4988(3)                                                        |
| b/Å                                         | 7.09306(15)                                                       |
| c/Å                                         | 13.9973(3)                                                        |
| α/°                                         | 90                                                                |
| β/°                                         | 102.543(2)                                                        |
| γ/°                                         | 90                                                                |
| Volume/Å <sup>3</sup>                       | 1211.31(4)                                                        |
| Z                                           | 4                                                                 |
| ρ <sub>calc</sub> /mm <sup>3</sup>          | 1.430                                                             |
| μ/mm <sup>-1</sup>                          | 2.742                                                             |
| F(000)                                      | 548.0                                                             |
| Crystal size/mm <sup>3</sup>                | 0.35 × 0.04 × 0.04                                                |
| 2θ range for data collection                | 6.47 to 144.312°                                                  |
| Index ranges                                | -15 ≤ h ≤ 15, -8 ≤ k ≤ 8, -17 ≤ l ≤ 15                            |
| Reflections collected                       | 4201                                                              |
| Independent reflections                     | 1911[R(int) = 0.0306]                                             |
| Data/restraints/parameters                  | 1911/2/162                                                        |
| Goodness-of-fit on F <sup>2</sup>           | 1.073                                                             |
| Final R indexes [I ≥ 2σ (I)]                | R <sub>1</sub> = 0.0281, wR <sub>2</sub> = 0.0734                 |
| Final R indexes [all data]                  | R <sub>1</sub> = 0.0285, wR <sub>2</sub> = 0.0739                 |
| Largest diff. peak/hole / e Å <sup>-3</sup> | 0.22/-0.18                                                        |
| Flack parameter                             | -0.011(11)                                                        |
| Crystallisation solvent system              | Methanol/Ethanol (Slow evaporation)                               |
